# Supplementary material
Source: HighWire-hosted journal article supplement (http://molpharm.aspetjournals.org/highwire/filestream/76786/field_highwire_adjunct_files/15/SupplementrayFig3.pdf)

# Supplementary Figure S3

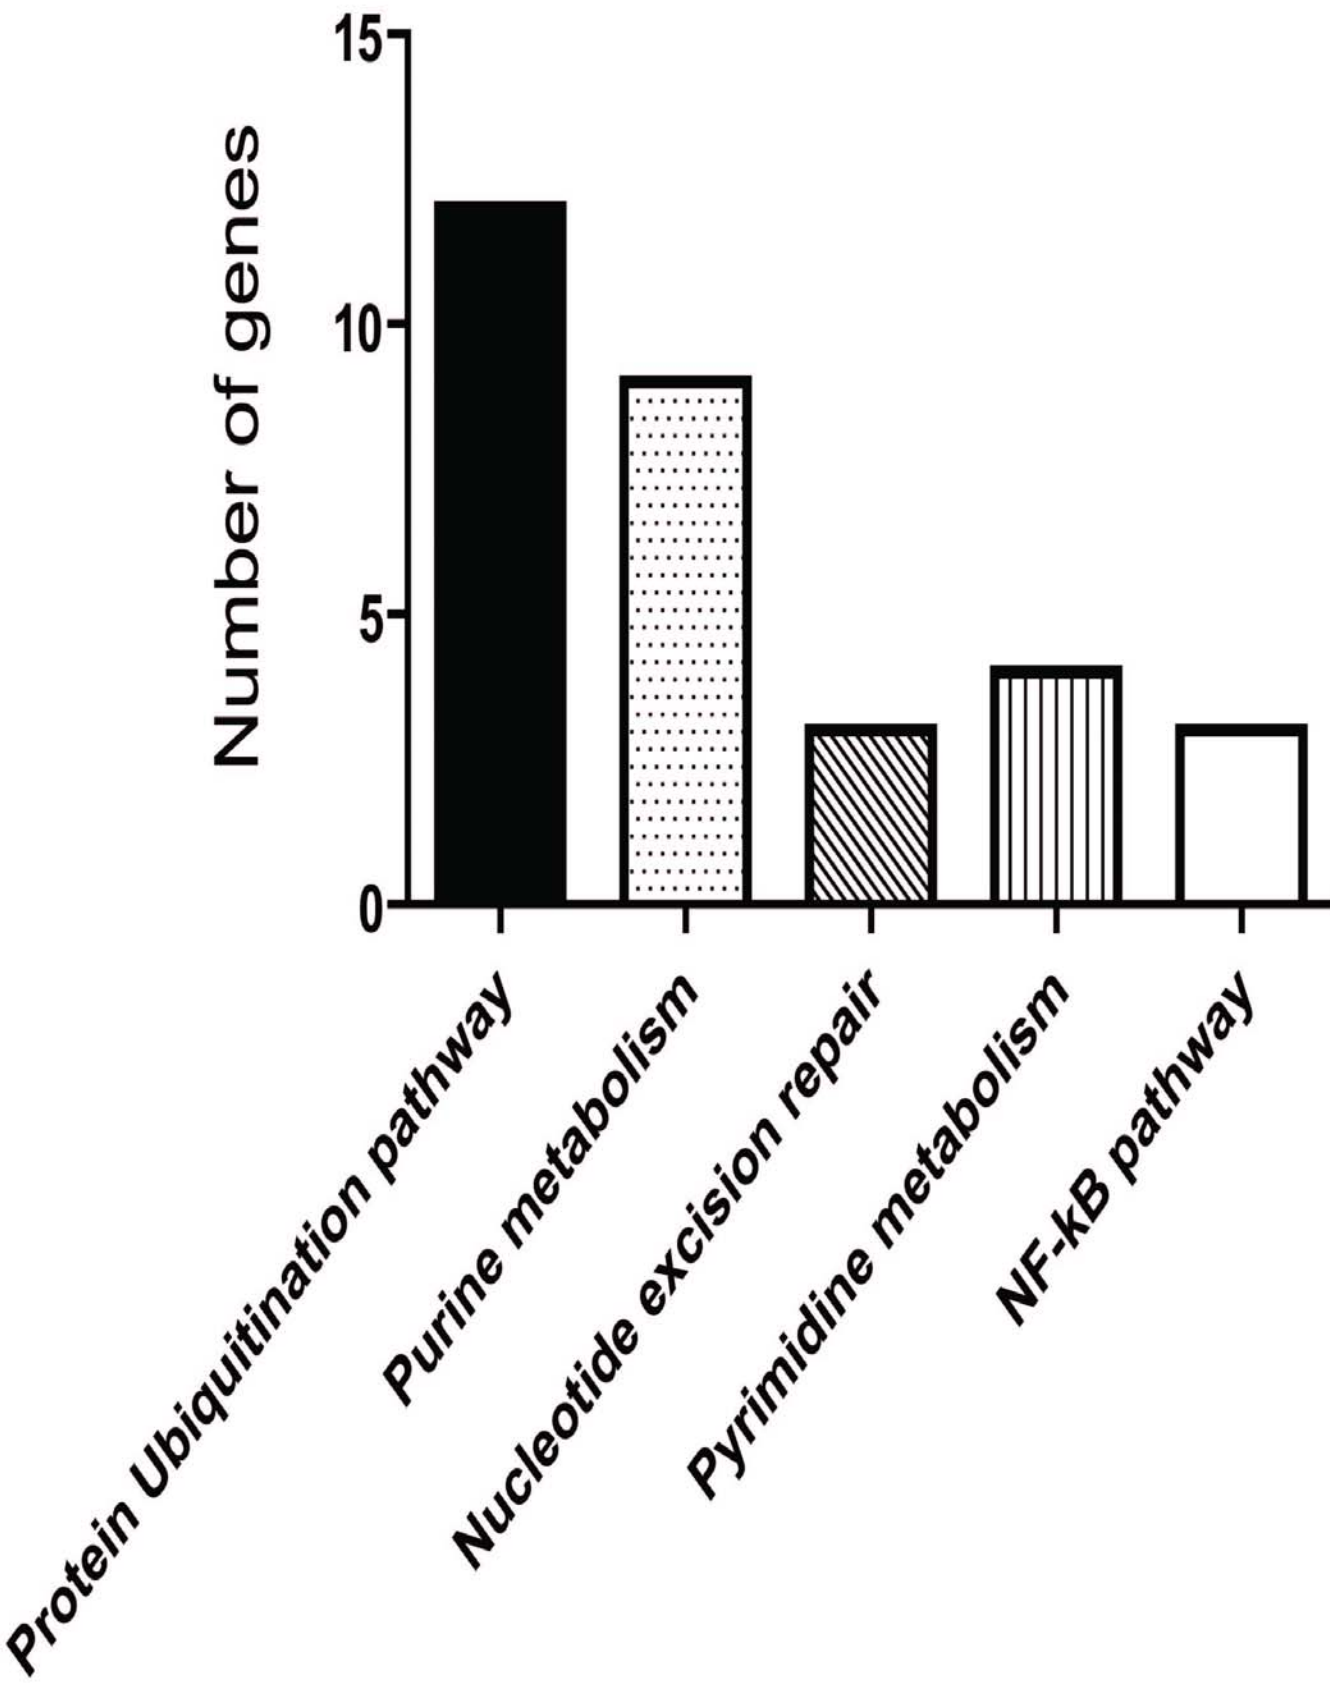

Supplement: SupplementrayFig3.pdf [file SupplementrayFig3.pdf]
